# Supplementary material for: Physical activity participation and the risk of chronic diseases among South Asian adults: a systematic review and meta-analysis
Source: PubMed Central journal article supplement (PMC6611898; doi:10.1038/s41598-019-46154-3), 2019-07-05
Supplement: 41598_2019_46154_MOESM1_ESM.pdf [file 41598_2019_46154_MOESM1_ESM.pdf]

**Physical activity participation and the risk of chronic diseases among South Asian adults: a systematic review and meta-analysis**

**Authors:** Susan Paudel<sup>1\*</sup>, Alice J. Owen<sup>1</sup>, Ebenezer Owusu-Addo<sup>1,2</sup>, Ben J. Smith<sup>1,3</sup>

**Authors' information:**

<sup>1</sup>School of Public Health and Preventive Medicine, Monash University, Melbourne, Australia.

<sup>2</sup>Bureau of Integrated Rural Development, Kwame Nkrumah University of Science & Technology, Kumasi, Ghana.

<sup>3</sup>Sydney School of Public Health, The University of Sydney, Sydney, Australia.

\*Correspondence: [susan.paudelsubedi@monash.edu](mailto:susan.paudelsubedi@monash.edu), [repliesusan@gmail.com](mailto:repliesusan@gmail.com)

Table 1: Search strategy in Medline database

Title of the database searched: **Ovid MEDLINE(R) Epub Ahead of Print, In-Process & Other Non-Indexed Citations, Ovid MEDLINE(R) Daily, Ovid MEDLINE and Versions(R)** 1946 to March 14, 2018

Name of the software platform: Ovid

Date search was run: 18 March 2018

Limits used: English language, humans, age group: 19+, journal articles

Search Strategy:

| #  | Searches                                                                                                                                                                                                                                                                                                                               | Results |
|----|----------------------------------------------------------------------------------------------------------------------------------------------------------------------------------------------------------------------------------------------------------------------------------------------------------------------------------------|---------|
| 1  | bangladesh/ or bhutan/ or india/ or nepal/ or pakistan/ or sri lanka/                                                                                                                                                                                                                                                                  | 123041  |
| 2  | (bangladesh* or bhutan* or india* or afghan* or nepal* or pakistan* or sri lanka* or srilanka* or maldiv* or south asia* or southasia*).mp.                                                                                                                                                                                            | 243160  |
| 3  | 1 or 2                                                                                                                                                                                                                                                                                                                                 | 243160  |
| 4  | exercise/ or muscle stretching exercises/ or resistance training/ or running/ or jogging/ or swimming/ or walking/ or stair climbing/ or leisure activities/ or recreation/ or dancing/ or gardening/ or games, recreational/ or video games/ or sports/ or physical fitness/ or bicycling/                                            | 209480  |
| 5  | (physical activit* or physical inactiv* or exercise* or nonexerciser* or non exerciser* or muscle stretching exercise* or resistance train* or run* or jog* or swim* or walk* or stair* climb* or leisure activit* or recreation or danc* or gardening or games, recreational or sport* or physical fitness* or cycle* or bicycl*).mp. | 1287470 |
| 6  | "Physical Education and Training"/ or Motor Activity/ or life style/ or sedentary lifestyle/                                                                                                                                                                                                                                           | 156874  |
| 7  | (physical education or fitness* or motor activity).mp.                                                                                                                                                                                                                                                                                 | 185211  |
| 8  | (lifestyle* or life style* or sitting time).mp.                                                                                                                                                                                                                                                                                        | 121344  |
| 9  | (sedentary adj1 (lifestyle* or activit* or behavio?r* or time)).mp.                                                                                                                                                                                                                                                                    | 12706   |
| 10 | TELEVISION/ or Computers, Handheld/ or SMARTPHONE/ or Cell Phone/                                                                                                                                                                                                                                                                      | 24081   |
| 11 | (computer* or smartphone* or mobile phone* or cell phone* or television* or TV).mp.                                                                                                                                                                                                                                                    | 768086  |
| 12 | (leisure adj3 activit*).mp.                                                                                                                                                                                                                                                                                                            | 12667   |
| 13 | ((household or domestic) adj activit*).mp.                                                                                                                                                                                                                                                                                             | 792     |
| 14 | (leisure adj2 exercise*).mp.                                                                                                                                                                                                                                                                                                           | 449     |
| 15 | ((TV or television) adj3 (watch* or view* or time)).mp.                                                                                                                                                                                                                                                                                | 2729    |
| 16 | ((screen or screen based) adj2 (time or view*)).mp.                                                                                                                                                                                                                                                                                    | 1857    |
| 17 | 4 or 5 or 6 or 7 or 8 or 9 or 10 or 11 or 12 or 13 or 14 or 15 or 16                                                                                                                                                                                                                                                                   | 2188959 |
| 18 | diabetes mellitus, type 2/                                                                                                                                                                                                                                                                                                             | 111829  |
| 19 | chronic disease/ or noncommunicable diseases/                                                                                                                                                                                                                                                                                          | 246642  |
| 20 | (chronic disease* or noncommunicable disease* or non communicable disease*).mp.                                                                                                                                                                                                                                                        | 291459  |
| 21 | ((type II or type 2) adj diabetes).mp.                                                                                                                                                                                                                                                                                                 | 108488  |
| 22 | (T2D or NIDDM or noninsulin or non insulin).mp.                                                                                                                                                                                                                                                                                        | 21904   |
| 23 | coronary disease/ or coronary artery disease/ or myocardial infarction/                                                                                                                                                                                                                                                                | 313408  |

|    |                                                                                                                                                                                                                                          |             |
|----|------------------------------------------------------------------------------------------------------------------------------------------------------------------------------------------------------------------------------------------|-------------|
| 24 | stroke/ or brain infarction/                                                                                                                                                                                                             | 85134       |
| 25 | Breast Neoplasms/ or colorectal neoplasms/ or musculoskeletal diseases/                                                                                                                                                                  | 338017      |
| 26 | ((breast or colon or colorectal) adj3 (cancer* or tumor* or neoplasm*)).mp.                                                                                                                                                              | 476115      |
| 27 | (coronary disease* or coronary artery disease* or myocardial infarction or myocardial ischemia or stroke* or cerebrovascular infarction or cerebrovascular accident or musculoskeletal disease* or brain infarction).mp.                 | 656045      |
| 28 | ((coronary or heart) adj2 disease*).mp.                                                                                                                                                                                                  | 408235      |
| 29 | Vascular Diseases/ or Peripheral Vascular Diseases/ or Peripheral Arterial Disease/                                                                                                                                                      | 48804       |
| 30 | (vascular disease* or peripheral vascular disease* or peripheral artery disease*).mp.                                                                                                                                                    | 86761       |
| 31 | LOW BACK PAIN/ or BACK PAIN/ or NECK PAIN/                                                                                                                                                                                               | 39444       |
| 32 | OSTEOARTHRITIS/                                                                                                                                                                                                                          | 33363       |
| 33 | OSTEOPOROSIS, POSTMENOPAUSAL/ or OSTEOPOROSIS/                                                                                                                                                                                           | 50905       |
| 34 | (low back pain or neck pain or back pain or osteoarthritis or osteoporosis).mp.                                                                                                                                                          | 209731      |
| 35 | 18 or 19 or 20 or 21 or 22 or 23 or 24 or 25 or 26 or 27 or 28 or 29 or 30 or 31 or 32 or 33 or 34                                                                                                                                       | 1951435     |
| 36 | body weight/ or overweight/ or obesity/ or adiposity/ or body mass index/ or waist-hip ratio/                                                                                                                                            | 388880      |
| 37 | (body weight or overweight or obese* or adipose* or body mass index or BMI or waist-hip ratio or waist circumference* or waist-height ratio).mp.                                                                                         | 778557      |
| 38 | ((abdominal or body) adj2 fat).mp.                                                                                                                                                                                                       | 44115       |
| 39 | Blood Pressure/ or blood glucose/ or lipids/ or triglycerides/ or metabolic syndrome/ or waist circumference/ or waist-height ratio/                                                                                                     | 559868      |
| 40 | HYPERTENSION/ or hyperglycemia/ or glucose intolerance/ or hyperinsulinism/ or insulin resistance/ or CHOLESTEROL, LDL/ or CHOLESTEROL/ or CHOLESTEROL, HDL/                                                                             | 428054      |
| 41 | (blood adj (glucose or sugar* or pressure)).mp.                                                                                                                                                                                          | 575970      |
| 42 | (lipid* or triglycer* or hypertensive* or hyperglycemic* or glucose intolerant* or hyperinsulin* or insulin resistant* or cholesterol* or fatty acid* or fatty tissue* or glycemic index or hypercholesterol* or metabolic syndrome).mp. | 1384690     |
| 43 | (pressure adj (diastolic or systolic)).mp.                                                                                                                                                                                               | 2464        |
| 44 | 36 or 37 or 38 or 39 or 40 or 41 or 42 or 43                                                                                                                                                                                             | 2227587     |
| 45 | 35 or 44                                                                                                                                                                                                                                 | 3807739     |
| 46 | 3 and 17 and 45                                                                                                                                                                                                                          | 4706        |
| 47 | limit 46 to (english language and humans and yr="2000 -Current" and ("adult (19 to 44 years)" or "middle aged (45 plus years)")) and journal article)                                                                                    | <b>1926</b> |

Note: # 3 indicates records related to South Asia, #17 indicates records related to physical activity, # 45 indicates records related to chronic disease or their markers, # 46 indicates records related to South Asia and physical activity and chronic disease/markers

**Table 2: Basic characteristics of the studies reviewed**

| Author             | Year | Country           | Study population                                             | Sample size                              | Outcome                                                                                    | PA types                                                  | Quality rating |
|--------------------|------|-------------------|--------------------------------------------------------------|------------------------------------------|--------------------------------------------------------------------------------------------|-----------------------------------------------------------|----------------|
| Quasem (1)         | 2001 | Bangladesh, India | 60 years and above                                           | 1203                                     | HTN                                                                                        | Total PA                                                  | Fair           |
| Zachariah (2)      | 2003 | India             | 40-60 years                                                  | 314                                      | HTN                                                                                        | Occupational PA                                           | Poor           |
| Subburam (3)       | 2009 | India             | 45-60 years                                                  | 406                                      | HTN                                                                                        | Occupational PA                                           | Poor           |
| Lloyd-Sherlock (4) | 2014 | India             | 50 years and above                                           | 7238                                     | HTN                                                                                        | Total PA                                                  | Fair           |
| Saeed (5)          | 2014 | Afghanistan       | 40 years and above                                           | 1183                                     | HTN                                                                                        | Walking                                                   | Fair           |
| Snehalatha (6)     | 2003 | India             | 20 years and above (specific results for 40 years and above) | 11216 (not reported for $\geq 40$ years) | T2D                                                                                        | Total PA                                                  | Poor           |
| Ansari (7)         | 2009 | Pakistan          | 45-64 years                                                  | 2053                                     | T2D                                                                                        | Total PA, LTPA, walking, cycling and household activities | Fair           |
| Chhetri (8)        | 2009 | Nepal             | 60 years and above                                           | 1633                                     | T2D                                                                                        | LTPA                                                      | Fair           |
| Jain (9)           | 2008 | India             | Men 40-60 years                                              | 394 (197 cases and controls each)        | CHD                                                                                        | Total PA                                                  | Fair           |
| Dhungana (10)      | 2015 | Nepal             | 40 years and above                                           | 166                                      | 10 year CVD risk level (coronary heart disease or stroke) by WHO/ISH risk prediction chart | Total PA                                                  | Fair           |
| Menon (11)         | 2016 | India             | 18 years and above (results specific to 40-59 years)         | 4507 (2597 in 40-59 years)               | 10 years and lifetime CVD risk score                                                       | Total PA                                                  | Poor           |
| Hamid (12)         | 2010 | Pakistan          | 40 years and above                                           | 300 (150 cases and controls each)        | Metabolic syndrome                                                                         | Total PA                                                  | Fair           |
| Gosh (13)          | 2005 | India             | Women 55 years and above                                     | 200                                      | Percentage of Body fat, fat mass index and fat-free mass index                             | Walking                                                   | Fair           |

|                 |      |                                               |                                                |                                   |                                                      |                                                                          |      |
|-----------------|------|-----------------------------------------------|------------------------------------------------|-----------------------------------|------------------------------------------------------|--------------------------------------------------------------------------|------|
| Kumar (14)      | 2008 | India, Sri Lanka                              | 48-69 years                                    | 330 (165 cases and controls each) | Total cholesterol and blood pressure                 | Walking                                                                  | Poor |
| Bhatt (15)      | 2016 | India                                         | 40-50 years                                    | 90                                | BMI, Waist circumference, fat mass and fat-free mass | Walking, cycling, PA level                                               | Poor |
| Jahan (16)      | 2017 | India                                         | 40-60 years                                    | 145                               | BMI, WC, WHR, blood pressure and metabolic syndrome  | Total PA and Step count                                                  | Fair |
| Dey (17)        | 2009 | India                                         | Post-menopausal women                          | 828 (431 cases, 397 controls)     | BC                                                   | Total household PA                                                       | Fair |
| Mathew (18)     | 2009 | India                                         | Postmenopausal women                           | 1659 (968 cases and 691 controls) | BC                                                   | Total household PA, walking, watching television (weekdays and weekends) | Fair |
| Keramat (19)    | 2008 | India,Iran                                    | Post-menopausal women                          | 354 (203 cases, 151 controls)     | Osteoporosis                                         | Walking and LTPA                                                         | Fair |
| Lekamwasam (20) | 2009 | Sri Lanka                                     | Men 50 years and above                         | 1147                              | Osteoporosis                                         | Total PA                                                                 | Poor |
| Begum (21)      | 2014 | Bangladesh                                    | 16-65 years (results specific for 46-65 years) | 500 (189 in 46-65 years)          | Osteoporosis                                         | Total PA                                                                 | Fair |
| Shetty (22)     | 2014 | India                                         | 50 years and above                             | 252                               | Osteoporosis                                         | Total PA                                                                 | Poor |
| Shenoy (23)     | 2017 | India                                         | 41-60 years                                    | 1911                              | Osteoporosis                                         | LTPA                                                                     | Fair |
| Bishwajit (24)  | 2017 | Bangladesh, India, Nepal, Pakistan, Sri Lanka | 50 years and above                             | 1189                              | Self-reported back pain                              | Total PA (vigorous and moderate) and walking                             | Poor |

**Table 3: Characteristics and results of studies: Cardiometabolic outcomes**

| <b>Author (year)</b>      | <b>Study design</b> | <b>Type of PA (recall period)</b> | <b>Measure of association</b> | <b>Results</b>                                                                                                                                                                                                                                                       | <b>Conclusion</b>                                                                                        |
|---------------------------|---------------------|-----------------------------------|-------------------------------|----------------------------------------------------------------------------------------------------------------------------------------------------------------------------------------------------------------------------------------------------------------------|----------------------------------------------------------------------------------------------------------|
| Quasem (2001) (1)         | Cross-sectional     | TPA (on an average day)           | Adjusted OR and 95% CI        | Sedentary group: Ref<br>Mild PA: 0.66 (0.49-0.89)<br>Moderate PA: 0.54 (0.31-0.96)<br>Adjusted for BMI, diabetes mellitus, education, residence status, current smoking status, age, sex, marital status, religion, past history of smoking                          | Self-reported mild or moderate PA is associated with lower odds of HTN.                                  |
| Zachariah (2003) (2)      | Cross-sectional     | OPA (regular day)                 | Adjusted OR and 95% CI        | Sedentary group: Ref<br>Mild PA: NS<br>Moderate PA: 0.35 (0.13-0.94)<br>Adjusted for age, BMI, sex, self-reported diabetes mellitus, socioeconomic status and smoking                                                                                                | Prevalence of HTN was lower among participants involved in occupations requiring moderate or greater PA. |
| Subburam (2009) (3)       | Cross-sectional     | OPA (on an average day)           | Adjusted OR and 95% CI        | Effect estimates not reported                                                                                                                                                                                                                                        | OPA is not associated with HTN.                                                                          |
| Lloyd-Sherlock (2014) (4) | Cross-sectional     | TPA                               | Adjusted OR and 95% CI        | Low: 1.21 (1.03-1.43)<br>Moderate: 0.99 (0.83-1.17)<br>High: Ref                                                                                                                                                                                                     | Higher odds of HTN among those with low PA.                                                              |
| Saeed (2014) (5)          | Cross-sectional     | Walking                           | Adjusted OR and 95% CI        | Frequency of walking per week in hours<br><10 hours/week: Ref<br>10-30 hours/week: 0.66 (0.51-0.86)<br>≥30 hours/week: 0.55 (0.37-0.77)<br><br>Walking to workstation<br>No: 1.22 (0.96-1.55)<br><br>Adjusted values are not significant. Not reported in the paper. | Walking is not associated with HTN.                                                                      |
| Snehalatha (2003) (6)     | Cross-sectional     | TPA                               | Adjusted OR and 95% CI        | Effect estimates not reported                                                                                                                                                                                                                                        | TPA is not associated with T2D.                                                                          |

|                      |                      |                                                                     |                              |                                                                                                                                                                                                                                                                                                                                                                                                        |                                                                                                                                                                                      |
|----------------------|----------------------|---------------------------------------------------------------------|------------------------------|--------------------------------------------------------------------------------------------------------------------------------------------------------------------------------------------------------------------------------------------------------------------------------------------------------------------------------------------------------------------------------------------------------|--------------------------------------------------------------------------------------------------------------------------------------------------------------------------------------|
| Ansari (2009) (7)    | Cross-sectional      | TPA, LTPA, walking, cycling and household activities (last 2 years) | Adjusted HR and 95% CI       | <p>LTPA<br/>Male: 0.78 (0.57-1.28)<br/>Female: 0.72 (0.58-0.97)</p> <p>TPA<br/>Male: 1.0 (0.60-1.58)<br/>Female: 0.75 (0.65-1.08)</p> <p>Adjusted for age and BMI</p> <p>Stair climbing inversely associated with T2D<br/>Cycling: 0.82 (0.68-1.00)<br/>Household activities and walking are not associated with T2D.</p>                                                                              | TPA is not associated with T2D among both men and women while LTPA is negatively associated with T2D among women. Stair climbing and cycling are also inversely associated with T2D. |
| Chhetri (2009) (8)   | Cross-sectional      | Exercise                                                            | Adjusted OR and 95% CI       | <p>Diabetes diagnosed during the survey<br/>Yes: 1.26 (p-value: 0.175)</p> <p>Diabetes diagnosed before the survey<br/>Yes: 1.56 (p-value: 0.045)</p> <p>Adjusted for age, education, health perception, caretaker at night, disturbed sleep, social participation, friends help in visiting health centre, family history of diabetes, history of HTN, family history of HTN, waist circumference</p> | Exercise is only associated with the risk of diabetes diagnosed before the survey.                                                                                                   |
| Jain (2008) (9)      | Matched case-control | TPA (in a normal week)                                              | Adjusted OR and 95% CI       | <p>Yes: Ref<br/>No: 1.28 (0.82-2.00)</p>                                                                                                                                                                                                                                                                                                                                                               | No statistically significant association existed between PA and CHD.                                                                                                                 |
| Dhungana (2015) (10) | Cross-sectional      | TPA (in last 7 days)                                                | p-value from chi-square test | <p>&lt;600 METs vs <math>\geq</math>600 METs: non-significant (p=0.219)<br/>Unadjusted association</p>                                                                                                                                                                                                                                                                                                 | PA is not associated with CVD risk.                                                                                                                                                  |
| Menon (2016) (11)    | Cross-sectional      | TPA                                                                 | p-value from chi-square test | <p>High (&gt;3000MET) vs Moderate (600-3000 METs) vs Low (&lt;600 METs)<br/>p= &lt;0.001 (40-59 yrs ) (0.009 for 60-79 yrs)<br/>Unadjusted association</p>                                                                                                                                                                                                                                             | Decreased PA is associated with high 10-year CVD risk among 60 to 79 year age group.                                                                                                 |

|                   |                      |                                                   |                                |                                                                                                                                                                                                                                                                                                                                                       |                   |             |                                     |                                                                                                                                                                |                                                                                                                            |
|-------------------|----------------------|---------------------------------------------------|--------------------------------|-------------------------------------------------------------------------------------------------------------------------------------------------------------------------------------------------------------------------------------------------------------------------------------------------------------------------------------------------------|-------------------|-------------|-------------------------------------|----------------------------------------------------------------------------------------------------------------------------------------------------------------|----------------------------------------------------------------------------------------------------------------------------|
| Kumar (2008) (14) | Matched case-control | Brisk walking                                     | P-value from student t-test    | Brisk walking                                                                                                                                                                                                                                                                                                                                         | Total cholesterol |             | Blood pressure (systolic/diastolic) |                                                                                                                                                                | A significant difference existed in total cholesterol and blood pressure between those who walked for >180min/wk and less. |
|                   |                      |                                                   |                                | ≥180 mins/wk                                                                                                                                                                                                                                                                                                                                          | 168.34±8.67       | 183.36±4.52 | 117.52±3.39<br>76.46 ± 4.23         | 139.17±9.29<br>82.37 ± 4.73                                                                                                                                    |                                                                                                                            |
|                   |                      |                                                   |                                | ≤180 mins/wk                                                                                                                                                                                                                                                                                                                                          | 156.48±7.48       | 168.34±7.24 | 101.23±4.19<br>70.16±5.62           | 126.18±9.28<br>79.12±3.67                                                                                                                                      |                                                                                                                            |
| Gosh (2005) (13)  | Cross-sectional      | Brisk walking (in a normal week)                  | Standardised beta coefficients | Percentage of body fat (PBF): p<0.05<br>Fat mass index (FMI): p<0.05<br>Fat-free mass index (FFMI): p<0.01                                                                                                                                                                                                                                            |                   |             |                                     | Walking had a protective effect on PBF, FMI and FFMI.                                                                                                          |                                                                                                                            |
| Hamid (2010) (12) | Matched case-control | TPA                                               | Adjusted OR and 95% CI         | Yes: Ref<br>No PA: 2.47 (1.50-4.07)                                                                                                                                                                                                                                                                                                                   |                   |             |                                     |                                                                                                                                                                |                                                                                                                            |
| Bhatt (2016) (15) | Cross-sectional      | Walking, bicycling, physical activity level (PAL) | Correlation coefficients       | Correlation coefficients<br>Walking: NS<br>Bicycling: -0.41(body weight), -0.25 (BMI), -0.39 (WC), -0.40 (fat mass), 0.31 (fat free mass)<br>PAL: -0.63(body weight), -0.59 (BMI), -0.57 (WC), -0.47 (fat mass), 0.45 (fat free mass)<br>All significant at 1% probability level                                                                      |                   |             |                                     | Walking had no effect but bicycling and PAL are negatively correlated with body composition measures (BMI, WC and fat mass) and positively with fat-free mass. |                                                                                                                            |
| Jahan (2017) (16) | Cross-sectional      | Walking (in last 7 days)                          | Correlation coefficients       | Walking categorised as <5000 steps/day (sedentary), 5000-7499 steps/day (low active), 7500-9999 steps/day (somewhat active) and 10,000 to 12,499 steps/day (active)<br>BMI: p=0.273<br>WC: 0.685<br>Height circumference (HC): 0.632<br>WHR: 0.913<br>Systolic blood pressure (SBP): 0.05<br>Diastolic blood pressure (DBP): 0.502<br>No of MeS: 0.41 |                   |             |                                     | No significant correlation between steps per day and health indices except SBP.                                                                                |                                                                                                                            |



**Table 4: Characteristics and results of studies: Breast Cancer**

| Author (year)      | Study design                                               | Type of PA (recall period)                       | Measures of association | Results                                                                                                                                                                                                                                                                                                                                                                                                                                                                                                                                                                                                                                                | Conclusion                                                                              |
|--------------------|------------------------------------------------------------|--------------------------------------------------|-------------------------|--------------------------------------------------------------------------------------------------------------------------------------------------------------------------------------------------------------------------------------------------------------------------------------------------------------------------------------------------------------------------------------------------------------------------------------------------------------------------------------------------------------------------------------------------------------------------------------------------------------------------------------------------------|-----------------------------------------------------------------------------------------|
| Dey (2009)(17)     | Matched case-control with 431 cases and 397 controls       | Household PA (on a normal day)                   | Adjusted OR and 95% CI  | <p>ER+ cases vs. controls<br/>           PA &lt;3hr/day: 1<br/>           PA 3-4hr/day: 1.37 (0.81-2.33)<br/>           PA 5-6hr/day: 0.60(0.36-0.98)<br/>           PA &gt;6hr/day: 0.56(0.29-1.09)<br/>           P for trend=0.003</p> <p>ER- cases vs. controls<br/>           PA &lt;3hr/day: 1<br/>           PA 3-4hr/day: 0.92(0.57-1.50)<br/>           PA 5-6hr/day: 0.70(0.46-1.05)<br/>           PA &gt;6hr/day: 0.60(0.35-1.03)<br/>           P for trend=0.009</p> <p>Values adjusted for age, religion, education, SES score, BMI, age at menarche, menstrual status, parity, age at marriage and total duration of breastfeeding</p> | Increased duration of household PA decreased the risk of BC among postmenopausal women. |
| Mathew (2009) (18) | Matched case-control study with 968 cases and 691 controls | Total household PA, walking, watching television | Adjusted OR and 95% CI  | <p>Total household PA<br/>           PA &lt;3hr/day: 1<br/>           PA 3-4hr/day: 0.84(0.59-1.19)<br/>           PA 4-5hr/day:0.77(0.54-1.09)<br/>           PA 5-6hr/day:0.49(0.34-0.72)<br/>           PA &gt;6hr/day: 0.51(0.35-0.73)<br/>           P for trend=0.00001</p> <p>Walking (to buy things/errands)<br/>           Nil: 1<br/>           &lt;30 min: 0.44 (0.29-0.65)<br/>           30-59 min:0.77 (0.57-1.03)<br/>           ≥60 min: 0.66 (0.46-0.95)<br/>           P for trend=0.00032</p>                                                                                                                                       | Increased duration of household PA decreased the risk of BC among postmenopausal women. |

|  |  |  |  |                                                                                                                                                                                                                                                                                                                                                                                                                       |  |
|--|--|--|--|-----------------------------------------------------------------------------------------------------------------------------------------------------------------------------------------------------------------------------------------------------------------------------------------------------------------------------------------------------------------------------------------------------------------------|--|
|  |  |  |  | <p>Washing and carrying water were significant but cooking, cleaning the house, ironing clothes, working in the garden, watching TV during weekdays and weekends were not statistically significant</p> <p>Values adjusted for age, centre, religion, marital status, education, socio-economic status, residence status, BMI, waist and hip sizes, parity, age at first childbirth and duration of breastfeeding</p> |  |
|--|--|--|--|-----------------------------------------------------------------------------------------------------------------------------------------------------------------------------------------------------------------------------------------------------------------------------------------------------------------------------------------------------------------------------------------------------------------------|--|

**Table 5: Characteristics and results of studies: Musculoskeletal conditions**

| Author (year)         | Study design         | Country    | Type of PA (recall period) | Measure of association       | Results                                                                                                                                                                                                                     | Conclusion                                                                                               |
|-----------------------|----------------------|------------|----------------------------|------------------------------|-----------------------------------------------------------------------------------------------------------------------------------------------------------------------------------------------------------------------------|----------------------------------------------------------------------------------------------------------|
| Keramat (2008) (19)   | Matched case-control | India      | Exercise, walking          | Adjusted OR and 95% CI       | Exercise<br>Yes: 0.40 (0.30-0.90) (adjusted for age)<br>All associations between osteoporosis and exercise, other exercises and regular walking are statistically non-significant when adjusted for age, height and weight. | Exercise had a protective effect on osteoporosis among post-menopausal women when only adjusted for age. |
| Lekawasam (2009) (20) | Cross-sectional      | Sri Lanka  | TPA (in a normal day)      | p-value from chi-square test | PA categorised as very active (5-7 days/week), moderately active (3-4 days/week) and less active (<3 days/week).<br>P-value for trend: 0.001                                                                                | High degree of PA is associated with higher BMD.                                                         |
| Begum (2014) (21)     | Cross-sectional      | Bangladesh | TPA (in last 7 days)       | Adjusted OR and 95% CI       | <120 min/week: Ref<br>≥120 min/week:<br>For lumbar spine: 1.35 (0.65-2.81)<br>For femoral neck: 0.76 (0.31-1.84)<br>For lumbar spine or femoral neck: 1.26 (0.61-2.63)                                                      | TPA is not associated with osteoporosis at any site.                                                     |
| Shetty (2014) (22)    | Cross-sectional      | India      | TPA                        | Adjusted OR and 95% CI       | No: Ref<br>Yes: 0.4 (0.12-0.9), p<0.0001                                                                                                                                                                                    | TPA has a protective effect on osteoporosis.                                                             |
| Shenoy (2017) (23)    | Cross-sectional      | India      | LTPA (in last 7 days)      | Adjusted OR and 95% CI       | Per 10 unit increase in METs: 0.68 (0.66-0.71), p<0.001                                                                                                                                                                     | Every 10-unit increase in TPA is negatively associated with the risk                                     |

|                       |                 |            |              |                        |                                                                                                                                                                         | of osteoporosis.                                                                               |
|-----------------------|-----------------|------------|--------------|------------------------|-------------------------------------------------------------------------------------------------------------------------------------------------------------------------|------------------------------------------------------------------------------------------------|
| Bishwajit (2017) (24) | Cross-sectional | Bangladesh | Vigorous TPA | Adjusted OR and 95% CI | Almost every day: Ref<br>Women: Few days/week: 1.41 (0.75-2.61), Almost never: 1.12 (0.48-2.60)<br>Men: Few days/week: 1.40 (0.93-2.09), Almost never: 1.42 (0.83-2.44) | Mixed associations existed between self-reported back pain and PA across gender and countries. |
|                       |                 |            | Moderate TPA |                        | W: Few days/week: 0.76 (0.48-1.20), Almost never: 0.86 (0.48-1.54)<br>M: Few days/week: 0.71 (0.48-1.04), Almost never: 0.77 (0.51-1.18)                                |                                                                                                |
|                       |                 |            | Walking      |                        | W: Few days/week: 0.89 (0.56-1.41), Almost never: 0.93 (0.54-1.59)<br>M: Few days/week: 0.80 (0.49-1.29), Almost never: 0.78 (0.51-1.19)                                |                                                                                                |
|                       |                 | India      | Vigorous TPA |                        | W: Few days/week: 0.89 (0.72-1.09), Almost never: 0.90 (0.65-1.24)<br>M: Few days/week: 0.76 (0.57-1.03), Almost never: 0.75 (0.45-1.25)                                |                                                                                                |
|                       |                 |            | Moderate TPA |                        | W: Few days/week: 1.36 (1.03-1.79), Almost never: 1.3 (1.04-1.69)<br>M: Few days/week: 1.38 (1.02-1.88), Almost never: 1.56 (1.00-2.44)                                 |                                                                                                |
|                       |                 |            | Walking      |                        | W: Few days/week: 1.26 (1.00-1.58), Almost never: 1.33 (1.01-1.75)<br>M: Few days/week: 1.25 (0.91-1.69), Almost never: 1.43 (0.96-2.12)                                |                                                                                                |
|                       |                 | Nepal      | Vigorous TPA |                        | W: Few days/week: 0.35 (0.88-1.13), Almost never: 0.55 (0.78-1.11)<br>M: Few days/week: 1.18 (0.78-1.77), Almost never: 1.02 (0.57-1.83)                                |                                                                                                |
|                       |                 |            | Moderate TPA |                        | W: Few days/week: 0.99 (0.99-0.70), Almost never: 0.67 (0.95-0.75)<br>M: Few days/week: 1.35(0.93-1.96), Almost never: 1.24 (0.67-2.28)                                 |                                                                                                |
|                       |                 |            | Walking      |                        | W: Few days/week: 0.90 (0.68-1.32), Almost never: 0.68 (0.19-1.59)<br>M: Few days/week: 1.36 (0.96-1.92), Almost never: 1.83 (1.14-2.93)                                |                                                                                                |
|                       |                 | Pakistan   | Vigorous TPA |                        | W: Few days/week: 0.51 (0.25-1.05), Almost never: 3.72 (1.09–12.63)<br>M: Few days/week: 0.68 (0.41–1.13), Almost never: 1.33 (0.52–3.38)                               |                                                                                                |
|                       |                 |            | Moderate TPA |                        | W: Few days/week: 1.77 (0.76–4.09), Almost never: 2.49 (1.45–4.29)<br>M: Few days/week: 0.67 (0.45–0.99), Almost never: 1.33 (0.66–2.66)                                |                                                                                                |
|                       |                 |            | Walking      |                        | W: Few days/week: 0.78 (0.52–1.17), Almost never: 0.61 (0.37–1.00)<br>M: Few days/week: 1.09 (0.68–1.72), Almost never: 2.85 (1.42–5.74)                                |                                                                                                |
|                       |                 | Sri Lanka  | Vigorous TPA |                        | W: Few days/week: 1.62 (1.12–2.34), Almost never: 1.36 (0.79–2.32)<br>M: Few days/week: 1.37 (0.96–1.96), Almost never: 1.39 (0.89–2.18)                                |                                                                                                |
|                       |                 |            | Moderate TPA |                        | W: Few days/week: 0.92 (0.62–1.36), Almost never: 1.58 (1.16–2.16)<br>M: Few days/week: 1.41 (0.97–2.03), Almost never: 1.17 (0.77–1.76)                                |                                                                                                |
|                       |                 |            | Walking      |                        | W: Few days/week: 1.09 (0.76–1.57), Almost never: 0.86 (0.61–1.23)<br>M: Few days/week: 1.28 (0.83–1.96), Almost never: 1.13 (0.70–1.81)                                |                                                                                                |

## References

1. Quasem I, Shetye MS, Alex SC, Nag AK, Sarma P, Thankappan K, et al. Prevalence, awareness, treatment and control of hypertension among the elderly in Bangladesh and India: a multicentre study. *Bulletin of the World health Organization*. 2001;79(6):490.
2. Zachariah MG, Thankappan K, Alex SC, Sarma P, Vasana R. Prevalence, correlates, awareness, treatment, and control of hypertension in a middle-aged urban population in Kerala. *Indian Heart Journal*. 2003;55(3):245-51.
3. Subburam R, Sankarapandian M, Gopinath D, Selvarajan S, Kabilan L. Prevalence of hypertension and correlates among adults of 45-60 years in a rural area of Tamil Nadu. *Indian Journal of Public Health*. 2009;53(1):37-40.
4. Lloyd-Sherlock P, Beard J, Minicuci N, Ebrahim S, Chatterji S. Hypertension among older adults in low-and middle-income countries: prevalence, awareness and control. *International Journal of Epidemiology*. 2014;43(1):116-28.
5. Saeed KMI, Rasooly MH, Brown NJ. Prevalence and predictors of adult hypertension in Kabul, Afghanistan. *BMC Public Health*. 2014;14(1):386.
6. Snehalatha C, Ramchandran A, Kapur A, Vijay V. Age-specific prevalence and risk associations for impaired glucose tolerance in urban southern Indian population. *Journal of Association of Physicians of India* 2003;51:766-70.
7. Ansari RM. Effect of physical activity and obesity on type 2 diabetes in a middle-aged population. *Journal of Environmental and Public Health*. 2009;2009.
8. Chhetri M, Chapman R. Prevalence and determinants of diabetes among the elderly population in the Kathmandu Valley of Nepal. *Nepal Med Coll J*. 2009;11(1):34-8.
9. Jain P, Jain P, Bhandari S, Siddhu A. A case-control study of risk factors for coronary heart disease in urban Indian middle-aged males. *Indian Heart J*. 2008;60(3):233-40.
10. Dhungana R, Khanal M, Pandey A, Thapa P, Devkota S, Mulu S, et al. Assessment of Short Term Cardiovascular Risk Among 40 Years and Above Population in a Selected Community of Kathmandu, Nepal. *Journal of Nepal Health Research Council*. 2015;13(29):66-72.
11. Menon VP, Edathadathil F, Sathyapalan D, Moni M, Don A, Balachandran S, et al. Assessment of 2013 AHA/ACC ASCVD risk scores with behavioral characteristics of an urban cohort in India: Preliminary analysis of Noncommunicable disease Initiatives and Research at AMrita (NIRAM) study. *Medicine*. 2016;95(49).
12. Hamid N, Jillani G, Parveen N, Haq I, Arif S, H H. Metabolic Syndrome and its Relationship with associated risk factors *J Med Sci*. 2010;18(4):186-90.
13. Ghosh A, Das AC. Explaining body composition by some covariate factors among the elderly Bengalee Hindu women of Calcutta, India. *The Journal of Nutrition, Health & Aging*. 2005;9(6):403-6.
14. Kumar A, Sivakanesan R, Nagtilak S. Behavioral pattern, life style and socio economic status in elderly normolipidemic acute myocardial infarct subjects-a case control study from South Asia. *Internet J Cardiovasc Res*. 2009;6(2).
15. Bhatt N, Bains K, Aggarwal R. Association of selected anthropometric and body composition measures with diet and life style related factors among Punjabi adult males of India. *Applied Biological Research*. 2016;18(2):155-62.
16. Jahan N, Shenoy S. Relation of pedometer steps count & self reported physical activity with health indices in middle aged adults. *Diabetes & Metabolic Syndrome: Clinical Research & Reviews*. 2017;11:S1017-S23.

17. Dey S, Boffetta P, Mathews A, Brennan P, Soliman A, Mathew A. Risk factors according to estrogen receptor status of breast cancer patients in Trivandrum, South India. *International Journal of Cancer*. 2009;125(7):1663-70.
18. Mathew A, Gajalakshmi V, Rajan B, Kanimozhi VC, Brennan P, Binukumar BP, et al. Physical activity levels among urban and rural women in south India and the risk of breast cancer: a case–control study. *European Journal of Cancer Prevention*. 2009;18(5):368-76.
19. Keramat A, Patwardhan B, Larijani B, Chopra A, Mithal A, Chakravarty D, et al. The assessment of osteoporosis risk factors in Iranian women compared with Indian women. *BMC Musculoskeletal Disorders*. 2008;9(1):28.
20. Lekamwasam S, Wijayaratne L, Rodrigo M, Hewage U. Prevalence and determinants of osteoporosis among men aged 50 years or more in Sri Lanka: a community-based cross-sectional study. *Archives of Osteoporosis*. 2009;4(1-2):79-84.
21. Begum RA, Ali L, Akter J, Takahashi O, Fukui T, Rahman M. Osteopenia and osteoporosis among 16–65 year old women attending outpatient clinics. *Journal of Community Health*. 2014;39(6):1071-6.
22. Shetty S, Kapoor N, Naik D, Asha HS, Prabu S, Thomas N, et al. Osteoporosis in healthy South Indian males and the influence of life style factors and vitamin D status on bone mineral density. *Journal of Osteoporosis*. 2014;2014.
23. Shenoy S, Chawla JK, Gupta S, Sandhu JS. Prevalence of low bone health using quantitative ultrasound in Indian women aged 41–60 years: Its association with nutrition and other related risk factors. *Journal of Women & Aging*. 2017;29(4):334-47.
24. Bishwajit G, Tang S, Sanni Yaya ZF. Participation in physical activity and back pain among an elderly population in South Asia. *Journal of Pain Research*. 2017;10:905.

## List of abbreviations

|      |                                |
|------|--------------------------------|
| BMD  | Bone Mineral Density           |
| BMI  | Body Mass Index                |
| CHD  | Coronary Heart Disease         |
| CI   | Confidence Interval            |
| CVD  | CardioVascular Disease         |
| FFMI | Fat Free Mass Index            |
| FMI  | Fat Mass Index                 |
| HTN  | Hypertension                   |
| LTPA | Leisure Time Physical Activity |
| MeTS | Metabolic Syndrome             |
| METs | Metabolic Equivalent           |
| MPA  | Moderate Physical Activity     |
| OR   | Odds Ratio                     |
| PA   | Physical Activity              |
| T2DM | Type 2 Diabetes Mellitus       |
| WC   | Waist Circumference            |
| WHR  | Waist-Hip Ratio                |
